# Supplementary material
Source: Elsevier journal article supplement (https://www.sciencedirect.com/science/article/pii/S0210569120300036)
Supplement: mmc1 [file S0210569120300036:mmc1.docx]

**APENDICE A. Colaboradores Red Pediátrica de Latinoamérica (LARed) Network**

Dra. Analía Fernández, Hospital Durand, Buenos Aires, Argentina; Dr. Roberto Jabornisky, Dra. Silvina Muzzio, Hospital Juan Pablo II, Corrientes, Argentina; Dra. Evelin Cidral, Dr. Alejandro Mansur, Hospital Regional Olga Stucky de Rizzi, Reconquista, Argentina; Dr. Miguel Céspedes Lesczinsky, Dra. Zurama Velasco, Hospital Materno Infantil Boliviano Japonés, Trinidad, Bolivia; Dra. Regina Grigolli Cesar, Hospital Infantil Sabará, San Pablo, Brasil; Dr. Pablo Cruces, Dr. Tamara Cordova, Hospital El Carmen, Maipú, Santiago, Chile; Dr. Diego Aranguiz Quintanilla, Dr. Juan Sepúlveda, Dra. Ivette Padilla, Complejo Asistencial Dr. Víctor Ríos Ruíz, Los Ángeles, Chile; Dr. Alejandro Donoso, Dra. María José Núñez Sánchez, Dr. Alejandro Donoso, Hospital Clínico Metropolitano La Florida, Santiago, Chile; Dra. Adriana Wegner, Complejo Asistencial Dr. Sotero del Rio, Santiago, Chile; Dr. Pietro Pietroboni Fuster, Hospital Regional, Antofagasta, Chile; Dr. José Rosales Fernández, Dra. Silvia Sanabria, Hospital Nacional de niños " Dr. Carlos Sáenz Herrera", Costa Rica; Dra. Araní Ferre, Dra. Magalí España, Dra. Andrea Iroa, Dr. Raul Navatta, Hospital Policial, Montevideo, Uruguay; Dra. Ema Benech, Dra. Mónica Carro, Sanatorio Círculo Católico, Montevideo, Uruguay; Dra. Alicia Fernández, Asociación Española, Montevideo, Uruguay; Dr. Nicolás Monteverde, Dra. Martha Carbonell, Médica Uruguaya, Montevideo, Uruguay; Dr. Bernardo Alonso, Dr. Alberto Serra, Lic. Fatima Varela, Sanatorio Casa de Galicia, Montevideo, Uruguay; Lic. Cristina Courtie, Dr. Javier Martínez, Dra. Krystel Cantirán, Hospital Militar, Montevideo, Uruguay; Dra. Loredana Matrai, Dra. Cecilia Mislej, Hospital Evangélico, Montevideo, Uruguay; Dr. Luis Castro, Sanatorio CAMDEL, Minas, Uruguay; Dra. Soledad Menta, Hospital Tacuarembó, Uruguay; Dra. Carolina Talasimov, Lic. María José Caggiano, Sanatorio COMECA, Canelones, Uruguay; Dr. Luis Pedrozo, Dr. Alejandro Franco, Hospital Salto, Uruguay; Dr. Luis Martínez Arroyo, Dra. Silvia Dubra, Sanatorio COMEPA, Paysandú, Uruguay; Dra. Ana Inverso, Dra. Nora Mouta, Dra. María Parada, Lic. Karina Etulain, Sanatorio Semm-Mautone, Maldonado, Uruguay.
